# Supplementary material
Source: PubMed Central journal article supplement (PMC4733402)
Supplement: NIHMS709392-supplement-4.pdf [file NIHMS709392-supplement-4.pdf]

**Supplemental Material 3. Mean difference (intervention minus comparison) of change score (95%CI) at Year 1 (minus baseline) and the corresponding Effect Size for Health Related Quality of Life Scores in the Women's Health Initiative Dietary Modification Trial by Physical Activity Group**

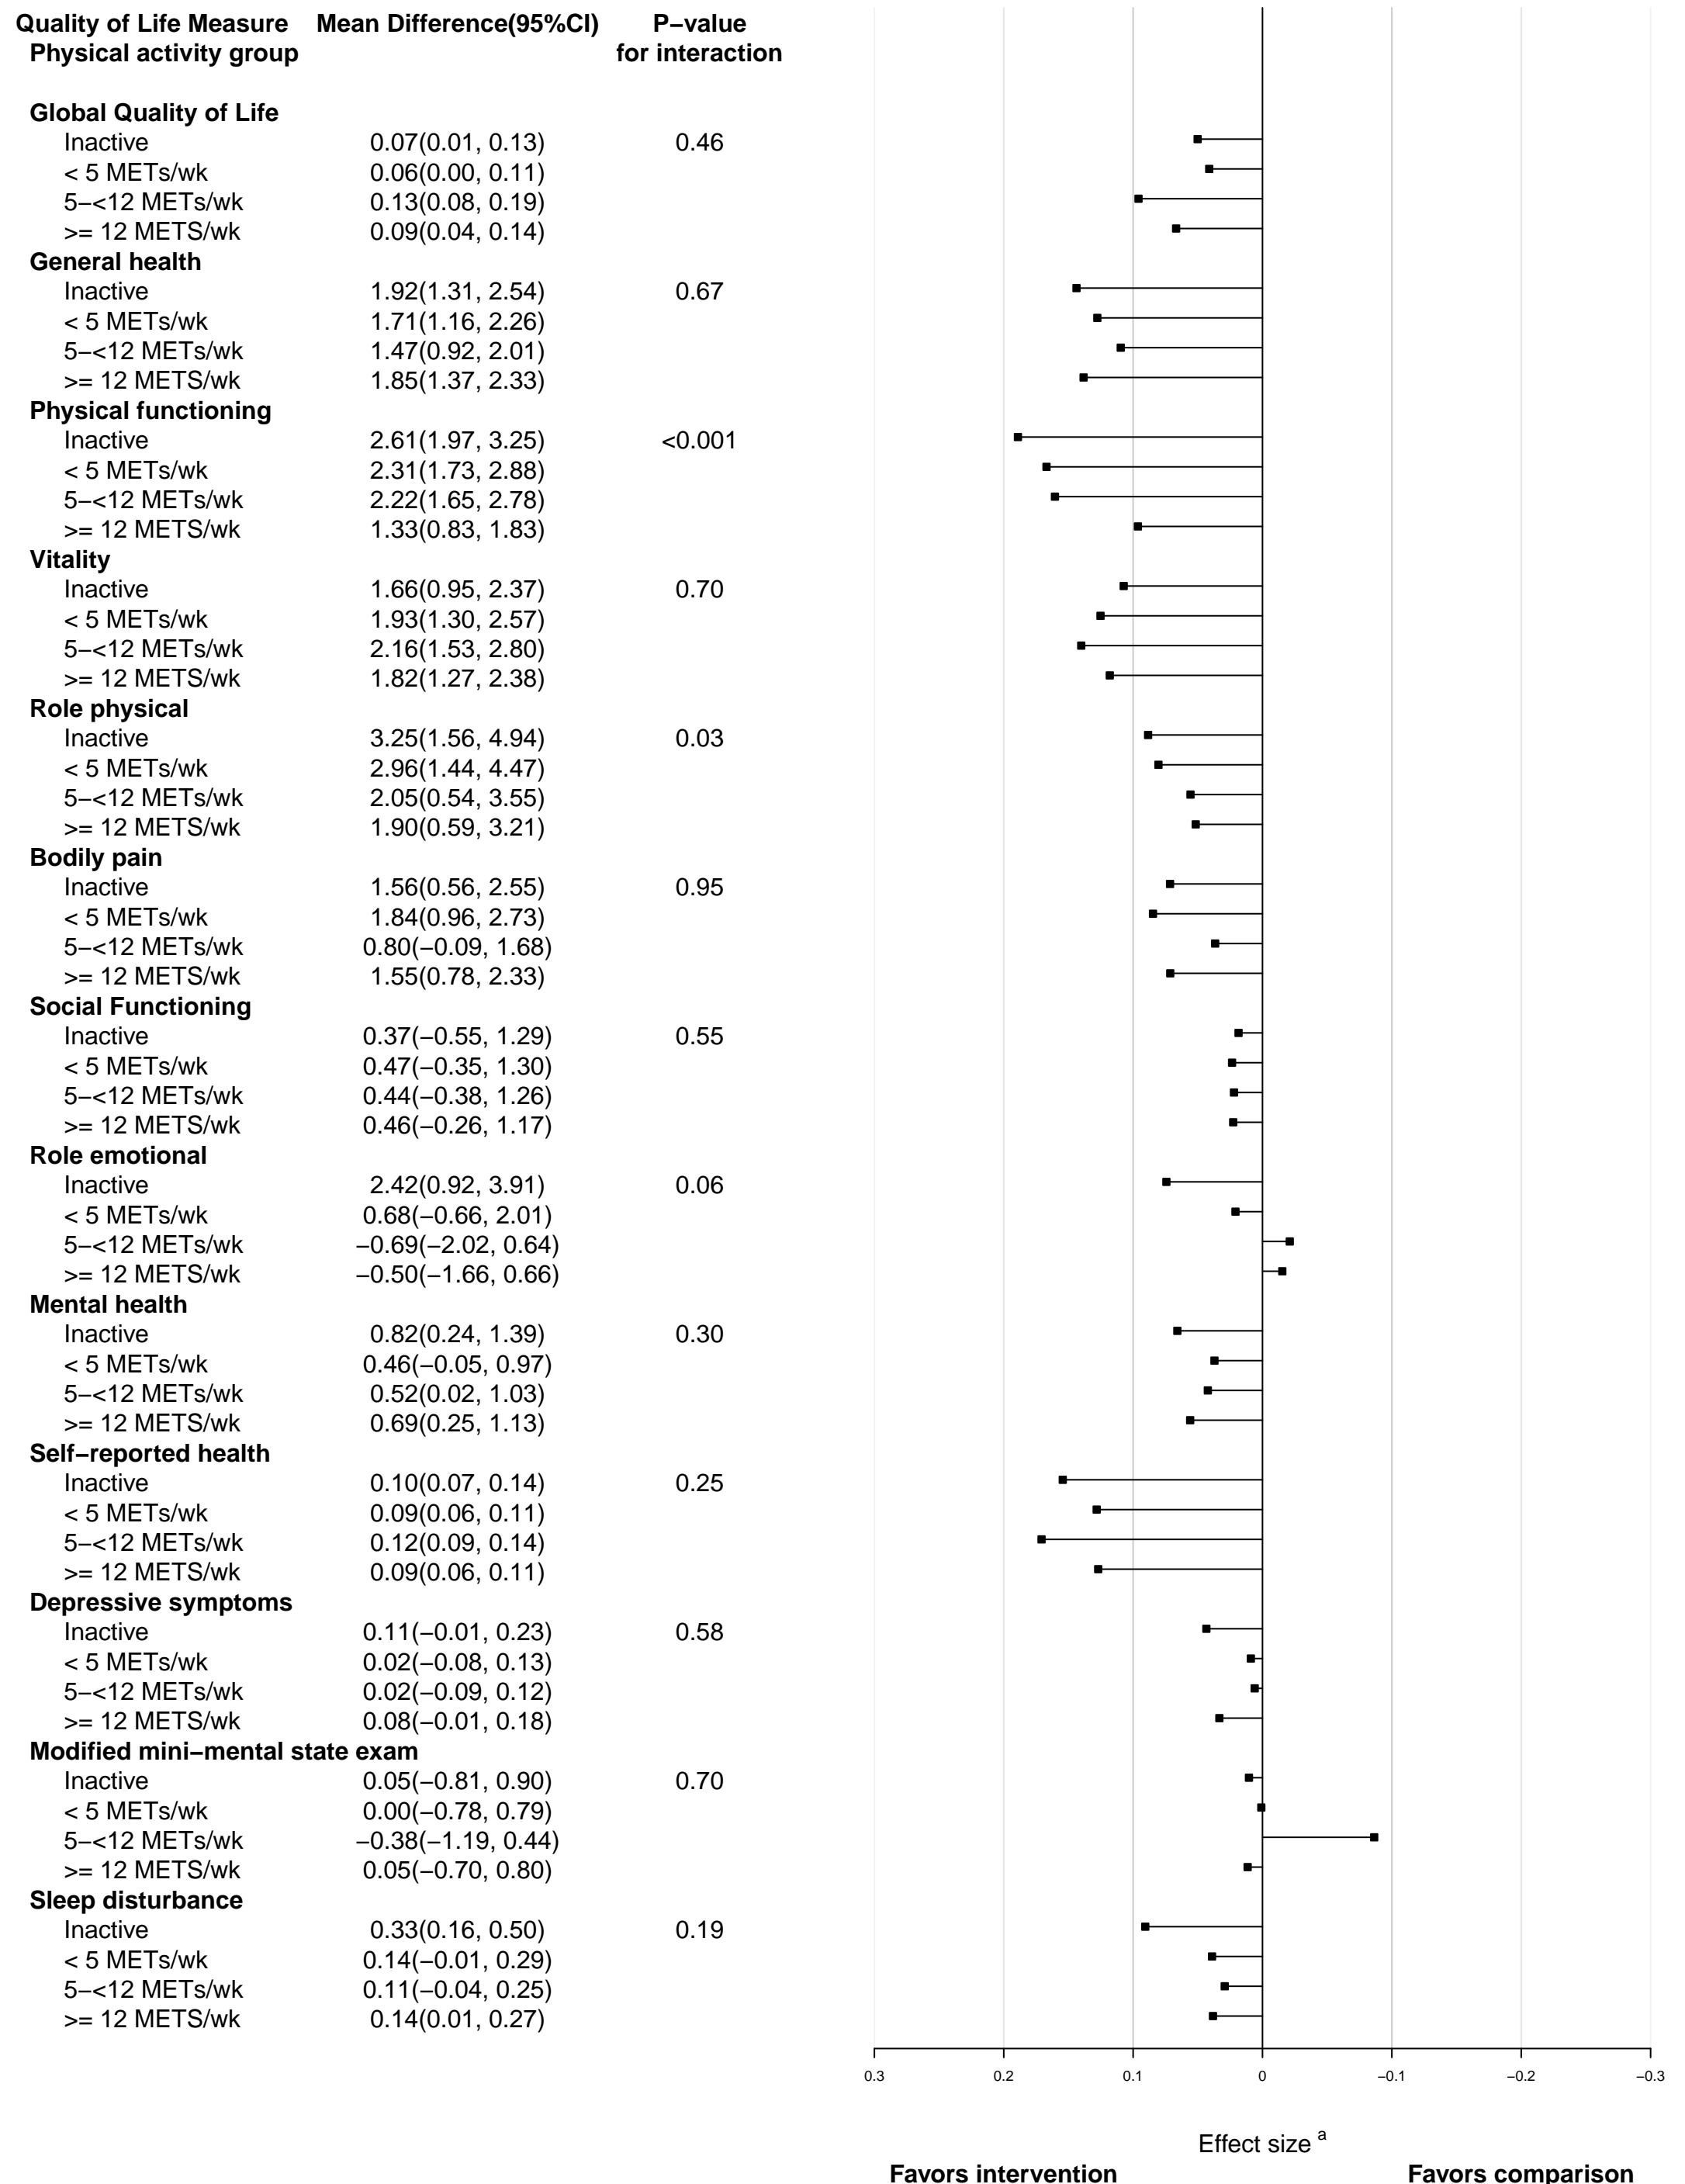

<sup>a</sup> Estimated Mean Difference at Year 1, divided by the root-mean-square error. For all measures, the sign of the effect size has been flipped (if necessary) so that adverse effects (favors comparison) extend to the right and favorable effects (favors intervention) extend to the left.
